# Supplementary material for: Allergic conditions and risk of rheumatoid arthritis: a Swedish case–control study
Source: HighWire-hosted journal article supplement (doi:10.1136/rmdopen-2021-002018), 2022-02-01
Supplement: rmdopen-2021-002018supp001_data_supplement.pdf [file rmdopen-2021-002018supp001_data_supplement.pdf]

**Table S1. Association between atopic dermatitis and risk of RA at specific ages**

| Age, years | Adjusted* Odds Ratio (95% CI) |                         |                         |
|------------|-------------------------------|-------------------------|-------------------------|
|            | All RA<br>(N = 3,115)         | ACPA+ RA<br>(N = 1,988) | ACPA- RA<br>(N = 1,057) |
| 20         | <b>0.67 (0.46,0.98)</b>       | 0.71 (0.46,1.10)        | 0.60 (0.33,1.09)        |
| 30         | 0.78 (0.59,1.04)              | 0.80 (0.58,1.10)        | 0.75 (0.48,1.17)        |
| 40         | 0.91 (0.75,1.11)              | 0.89 (0.71,1.11)        | 0.94 (0.70,1.27)        |
| 50         | 1.07 (0.92,1.25)              | 1.00 (0.84,1.19)        | 1.18 (0.95,1.47)        |
| 60         | <b>1.25 (1.03,1.52)</b>       | 1.12 (0.89,1.41)        | <b>1.48 (1.15,1.92)</b> |
| 70         | <b>1.46 (1.11,1.94)</b>       | 1.25 (0.90,1.75)        | <b>1.86 (1.27,2.71)</b> |
| 80         | <b>1.71 (1.17,2.51)</b>       | 1.41 (0.89,2.22)        | <b>2.33 (1.37,3.96)</b> |

ACPA = anti-citrullinated peptide antibodies, CI = confidence interval, RA = rheumatoid arthritis

\*Adjusting for age, sex, residential area, body mass index, education, and smoking (never, non-regular, ex, current)

**Table S2. Characteristics of the 111 EIRA participants missing one or more covariates compared to those missing none**

| <b>Characteristic</b>          | <b>Missing None<br/>(N=8,833)</b> | <b>Missing ≥1<br/>(N=111)</b> | <b>p-value</b> |
|--------------------------------|-----------------------------------|-------------------------------|----------------|
| Age, years, median (IQR)       | 55 (45,63)                        | 58 (43,65)                    | 0.23           |
| Female sex, N (%)              | 6,259 (71)                        | 72 (65)                       | 0.17           |
| BMI, kg/m <sup>2</sup> , N (%) |                                   |                               | 0.20           |
| <20                            | 565 (6)                           | 7 (9)                         |                |
| 20-25                          | 4,108 (47)                        | 42 (53)                       |                |
| 25-30                          | 2,964 (34)                        | 25 (32)                       |                |
| 30+                            | 1,196 (14)                        | 5 (6)                         |                |
| Educational level, N (%)       |                                   |                               | 0.04           |
| Compulsory school only         | 1,887 (21)                        | 32 (31)                       |                |
| Upper secondary school         | 4,403 (50)                        | 49 (48)                       |                |
| University degree              | 2,543 (29)                        | 22 (21)                       |                |
| Smoking status, N (%)          |                                   |                               | <0.001         |
| Never smoker                   | 3,532 (40)                        | 27 (71)                       |                |
| Non-regular smoker             | 764 (9)                           | 1 (3)                         |                |
| Ex-smoker                      | 2,699 (31)                        | 9 (24)                        |                |
| Current smoker                 | 1,838 (21)                        | 1 (2)                         |                |

BMI = body mass index, IQR = interquartile range, kg = kilograms, m = meters, RA = rheumatoid arthritis
